# Supplementary material for: Clinical and Prognostic Significance of Preoperative Plasma Fibrinogen Levels in Patients with Operable Breast Cancer
Source: PubMed Central journal article supplement (PMC4723094; doi:10.1371/journal.pone.0146233), 2016-01-22

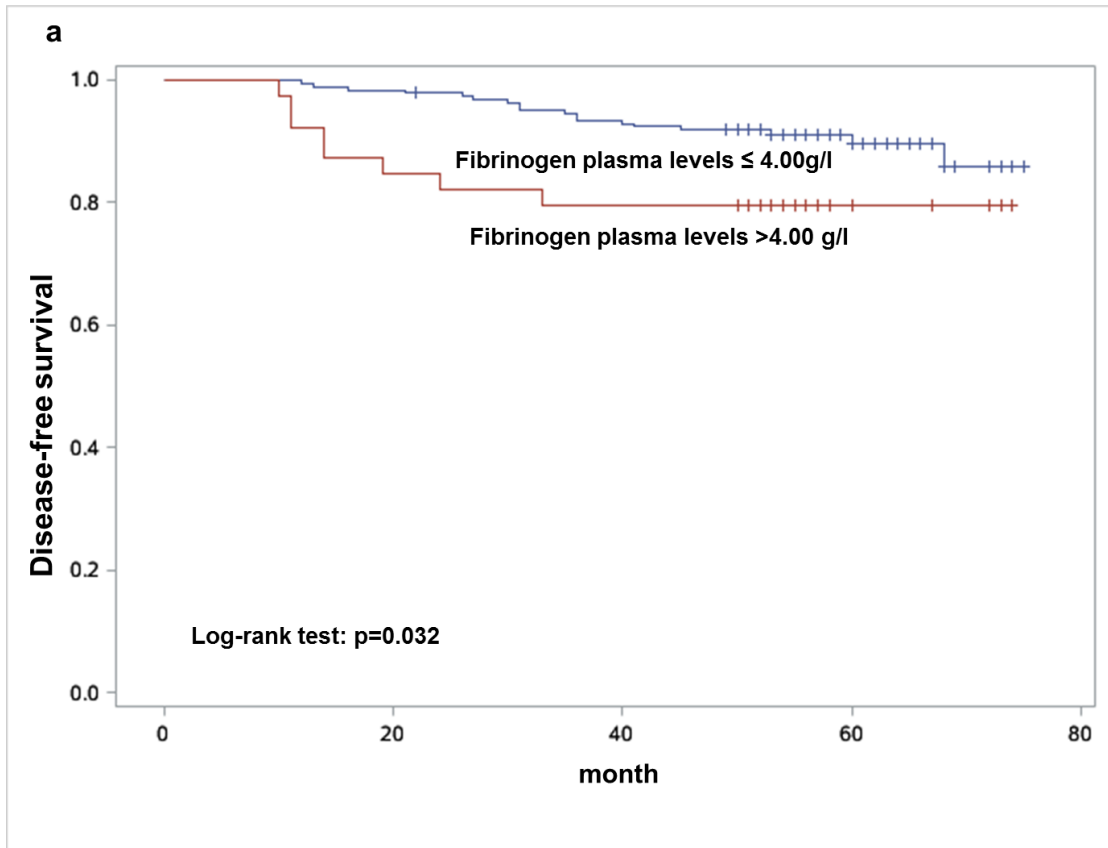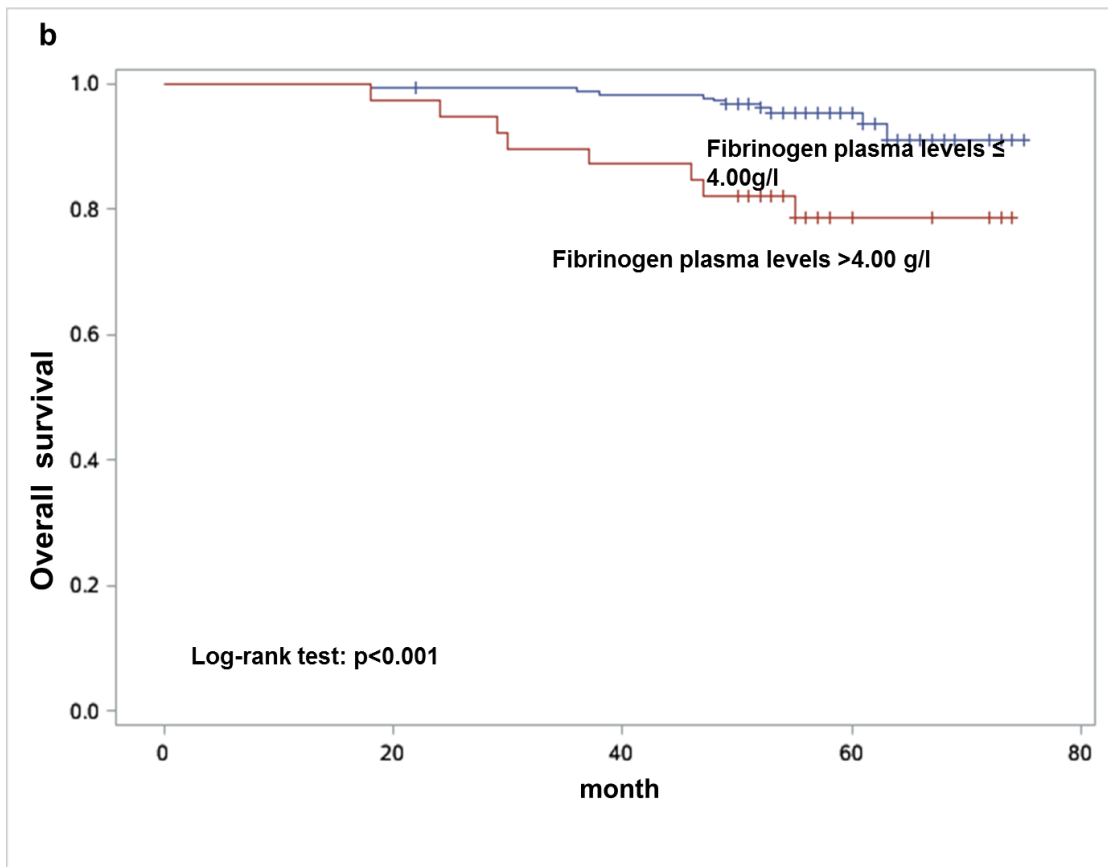

Supplement: pone.0146233.s002.pdf [file pone.0146233.s002.pdf]
